# Supplementary material
Source: PubMed Central journal article supplement (PMC3384818)
Supplement: supp_en.2011-1182_Supp_EN-11-1182revise.pdf [file supp_en.2011-1182_Supp_EN-11-1182revise.pdf]

**Supplemental Table 1**

| <b>Gene</b> | <b>Accession Number</b> | <b>Forward Sequence</b>  | <b>Reverse Sequence</b>     | <b>Ref</b> |
|-------------|-------------------------|--------------------------|-----------------------------|------------|
| 17βHSD      | NM_001007809            | CCTCACTTAATCAGGCTGCTTTG  | AAGTTAGGATCAATGTGTAAGGGATTC |            |
| 3β1HSD      | NM_001135932            | CATCATCCACACTGCCTCTATCA  | ACAGAAGCTGGGTACCTTTTCA      |            |
| 3β2HSD      | NM_174343               | CCTGCTGGAAGGAGACATTCTG   | GTGCTGGTGTGGATAAAGACCG      | (1)        |
| AKt         | NM_173986.2             | GACCACGCCAGCCCCACCAGT    | GGACAAGGACGGCCACATCAAGA     |            |
| AR          | AF105713.1              | CAATGAGTACCGCATGCACAA    | GGTGCCTCATTCCGGACACA        |            |
| CCND2       | EU626221.1              | CAGAAGGACATTAGCCCTACAT   | CTCACAGACCTCCAGCATCCA       |            |
| Cyp11a1     | NM_176644               | GCAGGGCTCCGGAAAGTT       | GGTGATGGACTCAAAGGCAA        |            |
| Cyp17       | M12547                  | TGATGATTGGACACCACCAGTTG  | AGAGAGAGAGGCTCGGACAGATC     | (2)        |
| Cyp19       | NM_174305               | CCTCAATACCAGGTCCCAGCTA   | GGAACCTGCAGTGGGAAATG        |            |
| ESR1        | AY033393.1              | TCGTCTCGGTTCCGTATGATG    | GACAGAAATGTGTACACCCAGAAT    |            |
| ESR2        | NM_001009737.1          | GCCGACAAGGAACTGGTACAC    | CCACGAAGCCCGGAATCT          |            |
| FDX1        | NM_181011               | TGATGGTTTTGGTGCATGTGA    | TGCTGTTCAAAGATGAGGTGACA     |            |
| FDXR        | NM_174691               | ACCTGGAGAAAACGGACATCA    | CACCGTCTTACCCGACTCT         |            |
| FSHR        | NM_001009289.1          | CGGTCTGAACTGAGGTTTGTTC   | GGTCTCCGAATCCTGAAAAGG       |            |
| GDF9        | NM_174681               | TGGCGGCAGGAACCTTT        | CAACAGTAACACGATCCAGGTTAAA   |            |
| IGF1        | NM_001009774.2          | AGCGCCACACCGACATG        | CCCTCTGCTTGTGTTCTTCAA       |            |
| IGFR1       | AF025303.1              | TTGAGCTGATGCGCATGTG      | GAACGAGGGCCGCATCTT          |            |
| IR          | XM_590552.4             | GACGCAGGCCGGAGATGACCA    | GCTCCTGCCGAAGACCGACTC       | (3)        |
| IRS1        | XM_581382.3             | TGGCACTGGGCGTAGAGGAGAAGG | CGCCATCAGCTACGCCGACAT       | (3)        |
| IRS2        | NM_003749.2             | CCCGAGAAGGTGGCCCGCATCA   | AGCAACACGCCGAGTCCATC        | (3)        |
| LHR         | NM_174381               | TGCCATCAAGAGAAAAATTTACCA | TCTGCTTTTTGTTGGCAGGTT       |            |
| mTOR        | XM_001788228.1          | ATCACCTTGCTCTCCGAACTCTC  | CCAGCTCCCGATCTCAAACACCT     | (3)        |
| PGR         | Z66555.1                | CCAGATATGGTCTATGCAGGACAT | TGTCAGCAGAGAGCTGGAGGTA      |            |
| PI3K        | NM_174574               | TTGTGCAACCTACGTGAATGTAAA | TCTCCTCCATGGTAGATACCTGTT    |            |
| PPARα       | NM_001034036            | TGAGGGCTGCAAGGGTTTC      | CAACTACGGTCACATTTGTCATACAC  |            |
| SRD5A1      | NM_001099137            | CTGGCCCAACTGCATCCT       | AAGCTCCGTTGCGCATAGTG        |            |

1. **Myers DA, Hyatt K, Mlynarczyk M, Bird IM, Ducsay CA** 2005 Long-term hypoxia represses the expression of key genes regulating cortisol biosynthesis in the near-term ovine fetus. *Am J Physiol Regul Integr Comp Physiol* 289:R1707-1714
2. **Lea RG, Wooding P, Stewart I, Hannah LT, Morton S, Wallace K, Aitken RP, Milne JS, Regnault TR, Anthony RV, Wallace JM** 2007 The expression of ovine placental lactogen, StAR and progesterone-associated steroidogenic enzymes in placentae of overnourished growing adolescent ewes. *Reproduction* 133:785-796
3. **Nada SE, Thompson RC, Padmanabhan V** 2010 Developmental programming: differential effects of prenatal testosterone excess on insulin target tissues. *Endocrinology* 151:5165-5173

Supplemental Table 2. microRNA differentially expressed in control vs testosterone, control vs testosterone plus flutamide, and testosterone vs testosterone plus flutamide treated fetal ovine ovaries.

| <b>miRNA</b> | <b>C vs. T FC</b> | <b>C vs TF FC</b> | <b>T vs TF FC</b> |
|--------------|-------------------|-------------------|-------------------|
| miR-497      | 3.83              | 3.71              | –                 |
| miR-29a      | 2.98              | –                 | –                 |
| miR-193      | 2.68              | –                 | –                 |
| miR-128      | 2.44              | 1.91              | -2.67             |
| miR-495      | 2.39              | –                 | –                 |
| miR-452      | 2.34              | –                 | –                 |
| miR-141*     | 2.29              | –                 | –                 |
| miR-329      | 2.27              | –                 | –                 |
| miR-192      | 2.19              | –                 | –                 |
| miR-150      | 2.14              | –                 | –                 |
| miR-24-2*    | 2.12              | –                 | -2.06             |
| miR-15b      | 2.06              | 2.93              | –                 |
| miR-135b     | 1.96              | –                 | –                 |
| miR-455      | 1.90              | 2.23              | –                 |
| miR-101      | 1.90              | –                 | –                 |
| miR-212      | 1.87              | –                 | –                 |
| miR-451      | 1.85              | –                 | –                 |
| miR-186      | 1.82              | –                 | –                 |
| miR-672      | 1.82              | –                 | –                 |
| miR-661      | 1.80              | –                 | -1.77             |
| miR-376c     | 1.75              | –                 | –                 |
| miR-7        | 1.67              | –                 | –                 |
| miR-376b     | 1.65              | 1.71              | –                 |
| miR-712      | 1.63              | –                 | –                 |
| miR-30b-5p   | 1.58              | –                 | –                 |
| miR-381      | 1.57              | –                 | –                 |
| miR-380-5p   | 1.55              | –                 | -1.84             |
| miR-496      | 1.54              | –                 | -1.65             |
| miR-540-3p   | 1.53              | –                 | –                 |
| miR-557      | 1.53              | –                 | -1.65             |
| miR-554      | 1.53              | –                 | –                 |
| miR-142b-5p  | 1.53              | –                 | –                 |
| miR-22*      | 1.52              | –                 | –                 |
| miR-460      | 1.52              | –                 | –                 |
| miR-206      | 1.52              | -1.56             | -1.73             |
| miR-203      | 1.51              | –                 | –                 |

|             |       |       |       |
|-------------|-------|-------|-------|
| miR-548f    | 1.51  | -     | -1.56 |
| miR-934     | 1.51  | -     | -1.61 |
| miR-378     | -4.13 | -     | 4.29  |
| miR-193a-5p | -2.86 | -     | -     |
| miR-760     | -2.80 | -     | -     |
| miR-10a     | -2.76 | -3.36 | -     |
| miR-541*    | -2.71 | -     | -     |
| miR-182     | -2.71 | -     | -     |
| miR-132     | -2.49 | -     | -     |
| miR-129*    | -2.22 | -     | -     |
| miR-727*    | -2.12 | -     | -     |
| miR-532-3p  | -1.99 | -     | -     |
| miR-1247    | -1.93 | -     | -     |
| miR-138     | -1.85 | -     | -     |
| miR-325     | -1.76 | -     | -     |
| miR-138*    | -1.75 | -     | -     |
| miR-1224*   | -1.69 | -     | -     |
| miR-223     | -1.69 | -     | -     |
| miR-667     | -1.66 | -     | -     |
| miR-759     | -1.64 | -     | -     |
| miR-423-5p  | -1.60 | -     | -     |
| miR-939     | -1.58 | -     | -     |
| miR-513b    | -1.51 | -     | -     |
| miR-219-5p  | -1.50 | -     | -     |
| miR-363     | -     | 4.50  | -     |
| miR-20b     | -     | 3.24  | -     |
| miR-374b    | -     | 2.07  | -     |
| miR-736     | -     | 1.98  | -     |
| miR-27e     | -     | 1.94  | -     |
| miR-365     | -     | 1.88  | -     |
| miR-124     | -     | 1.78  | -     |
| miR-1181    | -     | 1.74  | -     |
| miR-330     | -     | 1.71  | -     |
| miR-27c     | -     | 1.71  | -     |
| miR-29c     | -     | 1.64  | -     |
| miR-29b     | -     | 1.62  | -     |
| miR-519*    | -     | 1.61  | -     |
| miR-891b    | -     | 1.60  | 1.54  |
| miR-338-3p  | -     | 1.59  | -     |
| miR-886-3p  | -     | 1.59  | -     |

|            |   |       |       |
|------------|---|-------|-------|
| miR-454    | - | 1.57  | -     |
| miR-191*   | - | 1.56  | 1.69  |
| miR-218-1* | - | 1.56  | -     |
| miR-101a*  | - | 1.53  | -     |
| miR-467d   | - | 1.53  | -     |
| miR-105    | - | 1.52  | -     |
| miR-1308   | - | -2.89 | -     |
| miR-182    | - | -2.82 | -     |
| miR-1230   | - | -2.48 | -2.41 |
| miR-450a   | - | -1.90 | -     |
| miR-133a   | - | -1.85 | -     |
| miR-1235   | - | -1.75 | -     |
| miR-1202   | - | -1.66 | -     |
| miR-471    | - | -1.65 | -     |
| miR-431    | - | -1.63 | -     |
| miR-183    | - | -1.62 | -     |
| miR-568    | - | -1.60 | -     |
| miR-135a   | - | -1.57 | -     |
| miR-93*    | - | -1.55 | -     |
| miR-144    | - | -1.54 | -     |
| miR-23a*   | - | -1.51 | -     |
| miR-383    | - | -     | 3.27  |
| miR-467e*  | - | -     | 2.05  |
| miR-21     | - | -     | 1.91  |
| miR-302b*  | - | -     | 1.88  |
| miR-518d   | - | -     | 1.63  |
| miR-721    | - | -     | 1.62  |
| miR-330-5p | - | -     | 1.58  |
| miR-96     | - | -     | 1.58  |
| miR-502-5p | - | -     | 1.54  |
| miR-208a   | - | -     | 1.51  |
| miR-714    | - | -     | -2.33 |
| miR-451    | - | -     | -2.22 |
| miR-148b*  | - | -     | -2.10 |
| miR-200a*  | - | -     | -2.05 |
| miR-715    | - | -     | -2.01 |
| miR-1305   | - | -     | -1.85 |
| miR-196b   | - | -     | -1.75 |
| miR-466j   | - | -     | -1.66 |
| miR-1191   | - | -     | -1.65 |

|           |   |   |       |
|-----------|---|---|-------|
| miR-660   | - | - | -1.58 |
| miR-379   | - | - | -1.53 |
| miR-146a* | - | - | -1.51 |

Table 1 References - Supplemental Online Materials.

1. **Herrera BM, Lockstone HE, Taylor JM, Ria M, Barrett A, Collins S, Kaisaki P, Argoud K, Fernandez C, Travers ME, Grew JP, Randall JC, Gloyn AL, Gauguier D, McCarthy MI, Lindgren CM** 2010 Global microRNA expression profiles in insulin target tissues in a spontaneous rat model of type 2 diabetes. *Diabetologia* 53:1099-1109
2. **He A, Zhu L, Gupta N, Chang Y, Fang F** 2007 Overexpression of micro ribonucleic acid 29, highly up-regulated in diabetic rats, leads to insulin resistance in 3T3-L1 adipocytes. *Mol Endocrinol* 21:2785-2794
3. **Herrera BM, Lockstone HE, Taylor JM, Wills QF, Kaisaki PJ, Barrett A, Camps C, Fernandez C, Ragoussis J, Gauguier D, McCarthy MI, Lindgren CM** 2009 MicroRNA-125a is over-expressed in insulin target tissues in a spontaneous rat model of Type 2 Diabetes. *BMC Med Genomics* 2:54
4. **Kong L, Zhu J, Han W, Jiang X, Xu M, Zhao Y, Dong Q, Pang Z, Guan Q, Gao L, Zhao J, Zhao L** 2011 Significance of serum microRNAs in pre-diabetes and newly diagnosed type 2 diabetes: a clinical study. *Acta Diabetol* 48:61-69
5. **Pandey AK, Verma G, Vig S, Srivastava S, Srivastava AK, Datta M** 2011 miR-29a levels are elevated in the db/db mice liver and its overexpression leads to attenuation of insulin action on PEPCK gene expression in HepG2 cells. *Mol Cell Endocrinol* 332:125-133
6. **Yao N, Lu CL, Zhao JJ, Xia HF, Sun DG, Shi XQ, Wang C, Li D, Cui Y, Ma X** 2009 A network of miRNAs expressed in the ovary are regulated by FSH. *Front Biosci* 14:3239-3245
7. **Kato M, Zhang J, Wang M, Lanting L, Yuan H, Rossi JJ, Natarajan R** 2007 MicroRNA-192 in diabetic kidney glomeruli and its function in TGF-beta-induced collagen expression via inhibition of E-box repressors. *Proc Natl Acad Sci U S A* 104:3432-3437
8. **Krupa A, Jenkins R, Luo DD, Lewis A, Phillips A, Fraser D** 2010 Loss of MicroRNA-192 promotes fibrogenesis in diabetic nephropathy. *J Am Soc Nephrol* 21:438-447
9. **Zampetaki A, Kiechl S, Drozdov I, Willeit P, Mayr U, Prokopi M, Mayr A, Weger S, Oberhollenzer F, Bonora E, Shah A, Willeit J, Mayr M** 2010 Plasma microRNA profiling reveals loss of endothelial miR-126 and other microRNAs in type 2 diabetes. *Circ Res* 107:810-817
10. **Melkman-Zehavi T, Oren R, Kredon-Russo S, Shapira T, Mandelbaum AD, Rivkin N, Nir T, Lennox KA, Behlke MA, Dor Y, Hornstein E** 2011 miRNAs control insulin content in pancreatic beta-cells via downregulation of transcriptional repressors. *EMBO J* 30:835-845
11. **Hossain MM, Ghanem N, Hoelker M, Rings F, Phatsara C, Tholen E, Schellander K, Tesfaye D** 2009 Identification and characterization of miRNAs expressed in the bovine ovary. *BMC Genomics* 10:443
12. **Cao P, Deng Z, Wan M, Huang W, Cramer SD, Xu J, Lei M, Sui G** MicroRNA-101 negatively regulates Ezh2 and its expression is modulated by androgen receptor and HIF-1alpha/HIF-1beta. *Mol Cancer* 9:108
13. **Fiedler SD, Carletti MZ, Hong X, Christenson LK** 2008 Hormonal regulation of MicroRNA expression in periovulatory mouse mural granulosa cells. *Biol Reprod* 79:1030-1037
14. **Cheung L, Gustavsson C, Norstedt G, Tollet-Egnell P** 2009 Sex-different and growth hormone-regulated expression of microRNA in rat liver. *BMC Mol Biol* 10:13
15. **Chen BZ, Yu SL, Singh S, Kao LP, Tsai ZY, Yang PC, Chen BH, Shoei-Lung Li S** 2011 Identification of microRNAs expressed highly in pancreatic islet-like cell clusters differentiated from human embryonic stem cells. *Cell Biol Int* 35:29-37
16. **Ahn HW, Morin RD, Zhao H, Harris RA, Coarfa C, Chen ZJ, Milosavljevic A, Marra MA, Rajkovic A** 2010 MicroRNA transcriptome in the newborn mouse ovaries determined by massive parallel sequencing. *Mol Hum Reprod* 16:463-471
17. **Jiang L, Liu X, Chen Z, Jin Y, Heidbreder CE, Kolokythas A, Wang A, Dai Y, Zhou X** 2010 MicroRNA-7 targets IGF1R (insulin-like growth factor 1 receptor) in tongue squamous cell carcinoma cells. *Biochem J* 432:199-205

18. **Yu JY, Reynolds SH, Hatfield SD, Shcherbata HR, Fischer KA, Ward EJ, Long D, Ding Y, Ruohola-Baker H** 2009 Dicer-1-dependent Dacapo suppression acts downstream of Insulin receptor in regulating cell division of Drosophila germline stem cells. *Development* 136:1497-1507
19. **Mellios N, Galdzicka M, Ginns E, Baker SP, Rogaev E, Xu J, Akbarian S** 2010 Gender-Specific Reduction of Estrogen-Sensitive Small RNA, miR-30b, in Subjects With Schizophrenia. *Schizophr Bull Epub*
20. **Torley KJ, da Silveira JC, Smith P, Anthony RV, Veeramachaneni DN, Winger QA, Bouma GJ** 2011 Expression of miRNAs in ovine fetal gonads: potential role in gonadal differentiation. *Reprod Biol Endocrinol* 9:2
21. **Delic D, Grosser C, Dkhil M, Al-Quraishy S, Wunderlich F** 2010 Testosterone-induced upregulation of miRNAs in the female mouse liver. *Steroids* 75:998-1004
22. **Pandey DP, Picard D** 2009 miR-22 inhibits estrogen signaling by directly targeting the estrogen receptor alpha mRNA. *Mol Cell Biol* 29:3783-3790
23. **Fernandez-Hernando C, Suarez Y, Rayner KJ, Moore KJ** 2011 MicroRNAs in lipid metabolism. *Curr Opin Lipidol* 22:86-92
24. **Xu S, Linher-Melville K, Yang B, Wu D, Li J** 2011 Micro-RNA378 (miR-378) Regulates Ovarian Estradiol Production by Targeting Aromatase. *Endocrinology* 152
25. **Cicatiello L, Mutarelli M, Grober OM, Paris O, Ferraro L, Ravo M, Tarallo R, Luo S, Schroth GP, Seifert M, Zinser C, Chiusano ML, Traini A, De Bortoli M, Weisz A** 2010 Estrogen receptor alpha controls a gene network in luminal-like breast cancer cells comprising multiple transcription factors and microRNAs. *Am J Pathol* 176:2113-2130
26. **Waltering KK, Porkka KP, Jalava SE, Urbanucci A, Kohonen PJ, Latonen LM, Kallioniemi OP, Jenster G, Visakorpi T** 2011 Androgen regulation of microRNAs in prostate cancer. *Prostate* 71:604-614
27. **Sirotkin AV, Laukova M, Ovcharenko D, Brenaut P, Mlyncek M** 2010 Identification of microRNAs controlling human ovarian cell proliferation and apoptosis. *J Cell Physiol* 223:49-56
28. **Wang XH, Qian RZ, Zhang W, Chen SF, Jin HM, Hu RM** 2009 MicroRNA-320 expression in myocardial microvascular endothelial cells and its relationship with insulin-like growth factor-1 in type 2 diabetic rats. *Clin Exp Pharmacol Physiol* 36:181-188
29. **Huang P, Gong Y, Peng X, Li S, Yang Y, Feng Y** 2010 Cloning, identification, and expression analysis at the stage of gonadal sex differentiation of chicken miR-363 and 363\*. *Acta Biochim Biophys Sin (Shanghai)* 42:522-529
30. **Castellano L, Giamas G, Jacob J, Coombes RC, Lucchesi W, Thiruchelvam P, Barton G, Jiao LR, Wait R, Waxman J, Hannon GJ, Stebbing J** 2009 The estrogen receptor-alpha-induced microRNA signature regulates itself and its transcriptional response. *Proc Natl Acad Sci U S A* 106:15732-15737
31. **Goyal R, Goyal D, Leitzke A, Gheorghe CP, Longo LD** 2010 Brain renin-angiotensin system: fetal epigenetic programming by maternal protein restriction during pregnancy. *Reprod Sci* 17:227-238
32. **Long J, Wang Y, Wang W, Chang BH, Danesh FR** 2011 MicroRNA-29c is a signature MicroRNA under high glucose conditions which targets sprouty homolog 1, and its in vivo knockdown prevents progression of diabetic nephropathy. *J Biol Chem* 286:11837-11848
33. **Fred RG, Bang-Berthelsen CH, Mandrup-Poulsen T, Grunnet LG, Welsh N** 2010 High glucose suppresses human islet insulin biosynthesis by inducing miR-133a leading to decreased polypyrimidine tract binding protein-expression. *PLoS One* 5:e10843
34. **Granjon A, Gustin MP, Rieusset J, Lefai E, Meugnier E, Guller I, Cerutti C, Paultre C, Disse E, Rabasa-Lhoret R, Laville M, Vidal H, Rome S** 2009 The microRNA signature in response to insulin reveals its implication in the transcriptional action of insulin in human skeletal muscle and the role of a sterol regulatory element-binding protein-1c/myocyte enhancer factor 2C pathway. *Diabetes* 58:2555-2564
